# Supplementary material
Source: PubMed Central journal article supplement (PMC7364717)
Supplement: ao0c01865_si_001.pdf [file ao0c01865_si_001.pdf]

# Supporting Information for Publication

## Deep Proteomic Deconvolution of Interferon and HBV Transfection Effects on a Hepatoblastoma Cell Line

Kenneth Hodge<sup>1,6</sup>, Jiradej Makjaroen<sup>1,6</sup>, Jonathan Robinson<sup>2,3</sup>, Sakda Khoomrung<sup>4,5</sup>, and  
Trairak Pisitkun<sup>1\*</sup>

From <sup>1</sup> Center of Excellence in Systems Biology, Research Affairs, Faculty of Medicine,  
Chulalongkorn University, 1873 Rama 4 Road, Pathumwan, Bangkok 10330, Thailand.

From the <sup>2</sup> Department of Biology and Biological Engineering, National Bioinformatics  
Infrastructure Sweden, Science for Life Laboratory, Chalmers University of Technology,  
Kemivägen 10, Gothenburg, Sweden and <sup>3</sup> Wallenberg Center for Protein Research,  
Chalmers University of Technology, Kemivägen 10, Gothenburg, Sweden.

From the <sup>4</sup> Metabolomics and Systems Biology, Department of Biochemistry, and Siriraj  
Metabolomics and Phenomics Center Faculty of Medicine Siriraj Hospital, Mahidol  
University, Bangkok 10700, Thailand and <sup>5</sup> Center for Innovation in Chemistry (PERCH-  
CIC), Faculty of Science, Mahidol University, Rama 6 Road, Bangkok 10400, Thailand

<sup>6</sup>These authors contributed equally to this work.

\* Corresponding author: Trairak Pisitkun, MD  
Center of Excellence in Systems Biology, Research affairs  
Faculty of Medicine, Chulalongkorn University  
Bangkok, Thailand, 10330  
+6692-537-0549; pisitkut@nhlbi.nih.gov

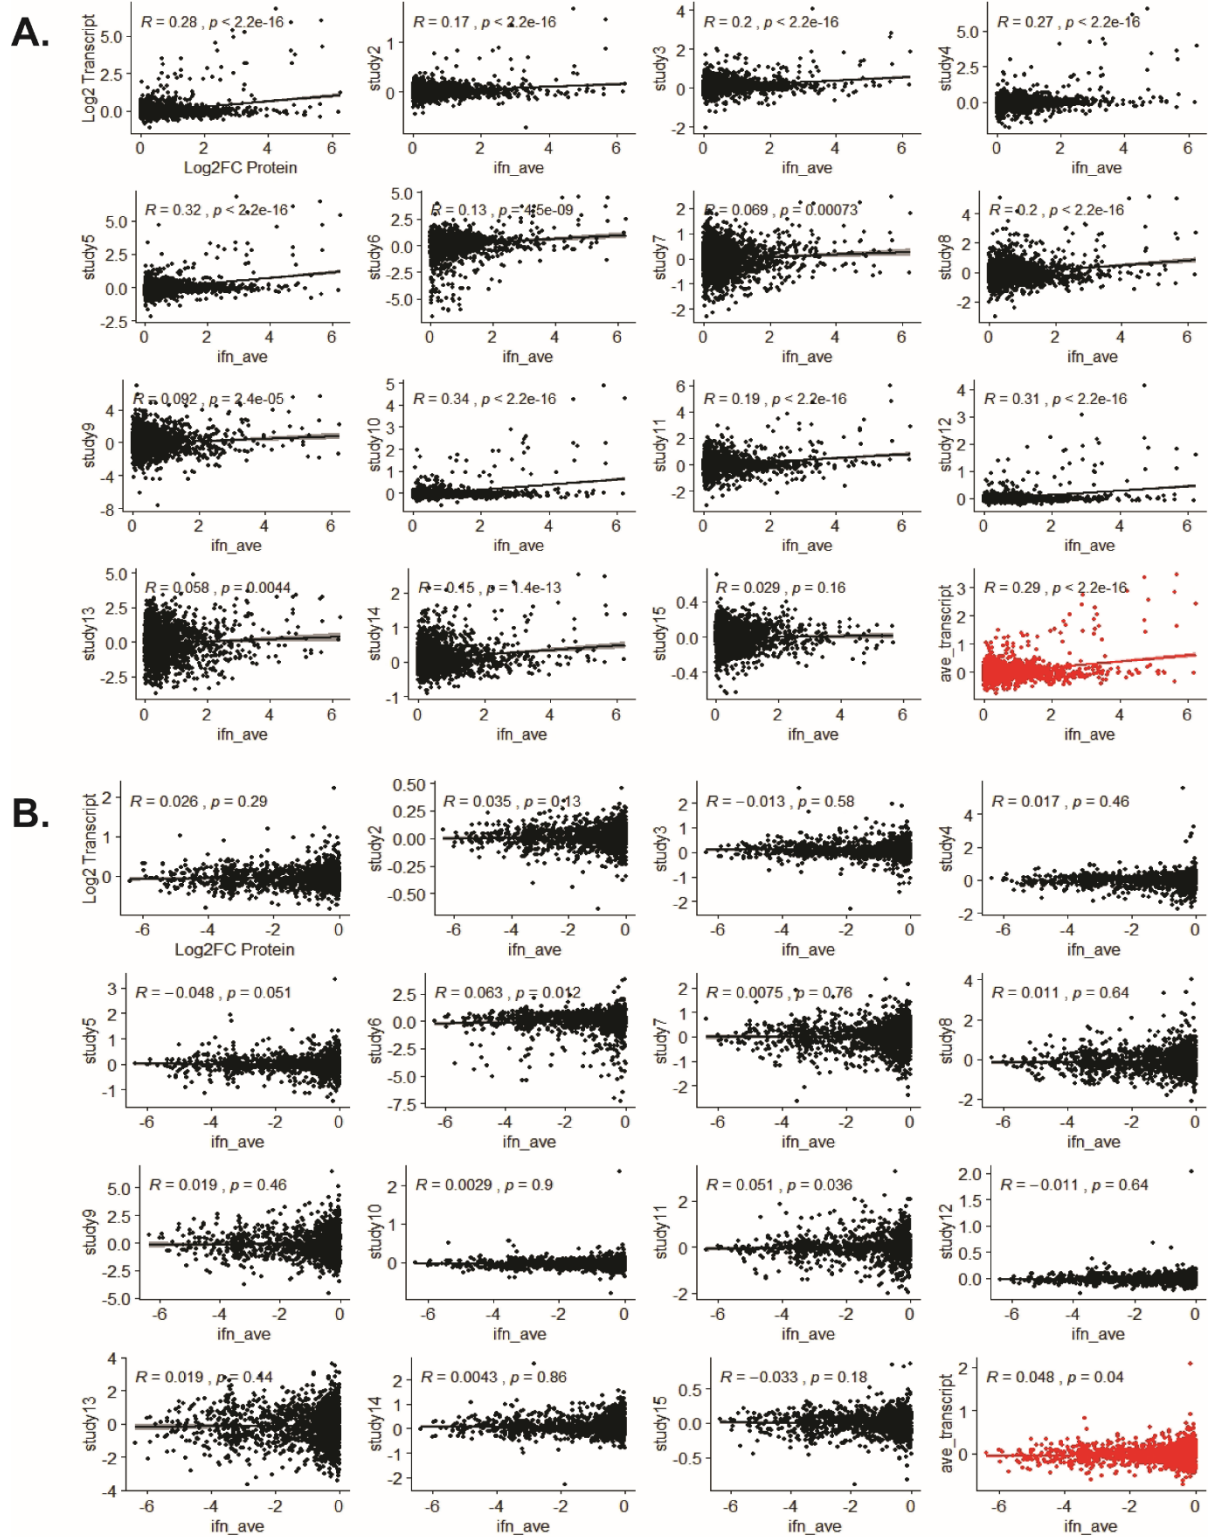

**Figure S1.** Pearson correlation analysis in which either upregulated (A) or downregulated (B) proteins were excluded in protein/transcript comparisons.

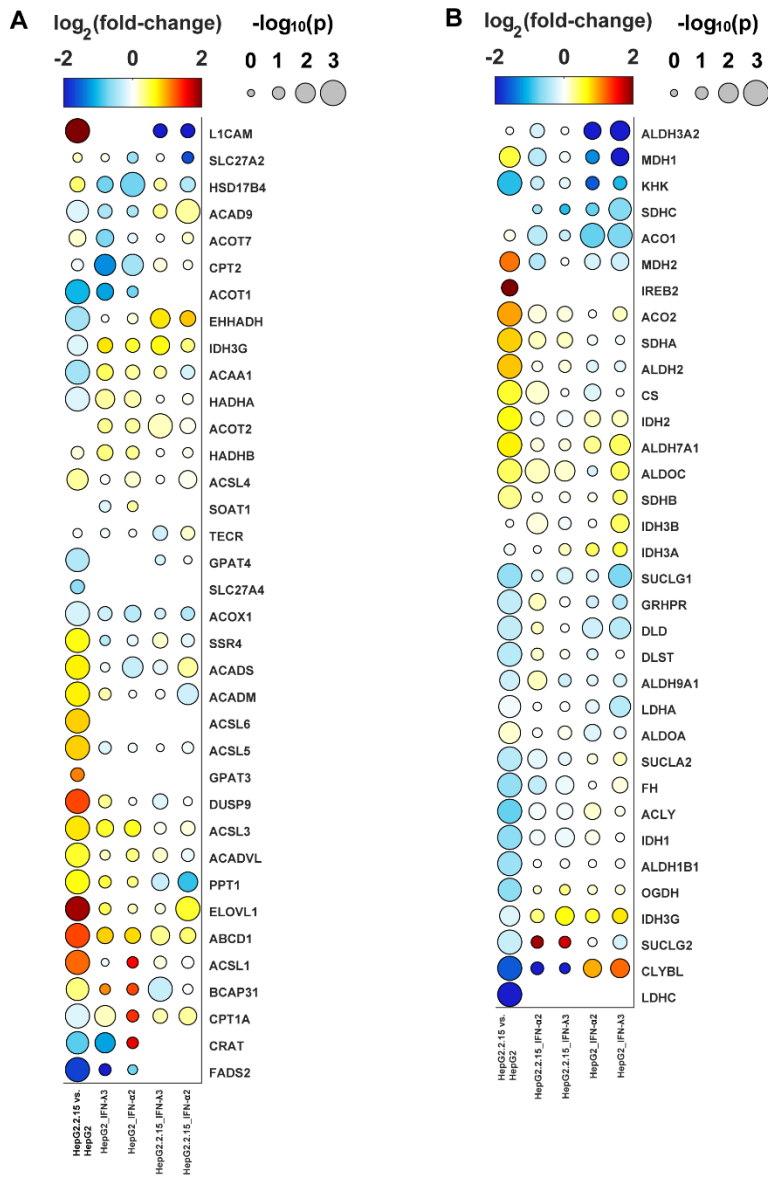

**Figure S2.** (A) Comparison of expression changes in proteins associated with acyl-CoA metabolites (13Z)-eicosenoyl-CoA, arachidonoyl-CoA, or linoleoyl-CoA. Circle colors indicate  $\log_2$  fold-change value, and the size represents the fold-change significance (p-value). Missing circles correspond to proteins that were not sufficiently detected. (B) Comparison of expression changes in proteins associated with the TCA cycle. Circle colors indicate  $\log_2$  fold-change value, and the size represents the fold-change significance (p-value). Missing circles correspond to proteins that were not sufficiently detected.
